# Supplementary material
Source: publisher figshare collection journal article supplement (https://frontiersin.figshare.com/ndownloader/files/21928587)
Supplement: Supplementary file [file 21928587]

# Lund Concept Treatment Algorithm

## First-Tier Therapy

## TIL score

|                              |                                       |   |
|------------------------------|---------------------------------------|---|
| Intubation                   | <i>Normoventilation</i>               |   |
| Deep sedation and analgesics | <i>Midazolam</i><br><i>Fentanyl</i>   | 2 |
| Normovolemia                 | <i>Albumin</i><br><i>Blood</i>        |   |
| Anti-hypertensives           | <i>Metoprolol</i><br><i>Clonidine</i> |   |
| Head elevation               | <i>30° maximum</i>                    | 1 |

## Second-Tier therapy

|                                         |                                |   |
|-----------------------------------------|--------------------------------|---|
| CSF-drainage                            | <i>low volume (&lt;5 ml/h)</i> | 2 |
| Fluid loading for maintaining CPP       | <i>Albumin 20%</i>             | 1 |
| Barbiturate coma                        | <i>Burst supression</i>        | 5 |
| Vasopressor therapy for maintaining CPP | <i>Low dose Dobutamine</i>     | 1 |

## Third-Tier therapy

|                                        |       |
|----------------------------------------|-------|
| Decompressive craniectomy/2:nd surgery | 4 - 5 |
|----------------------------------------|-------|
